# Supplementary material for: An approach to large scale identification of non-obvious structural similarities between proteins
Source: Springer Nature journal article supplement (doi:10.1186/1471-2105-5-61), 2004-05-17
Supplement: Additional file 1 [file 1471-2105-5-61-s1.doc]

**Table 1. Protein pairs from *H. sapien* and *C. trachomatis* with low sequence identity** and high structural similarity.

| Nr | Human protein | The best fold assigned | Chlamydia structural homologue | The best fold assigned | R score |
| --- | --- | --- | --- | --- | --- |
| 1 | Q92900  REGULATOR OF NONSENSE TRANSCRIPT STABILITY. | 1waj00 (NUCLEOTIDYLTRANSFERASE) | gi3328530gbAAC67722.1  Possible Transmembrane Protein | 1kit00 (HYDROLASE) | 0.9926 |
| 2 | Q9NQV6  PR- DOMAIN CONTAINING PROTEIN 10. | 1waj00 (NUCLEOTIDYLTRANSFERASE) | gi3329345gbAAC68468.1  Putative Outer Membrane Protein F | 1kit00 (HYDROLASE) | 0.9903 |
| 3 | ENSP00000064387  unknown | 1waj00 (NUCLEOTIDYLTRANSFERASE) | gi3329134gbAAC68277.1  PBP2- transglycolase/transpeptidase | 1dik00 (PHOSPHOTRANSFERASE) | 0.99 |
| 4 | Q9Y2H0  KIAA0964 protein | 1sly00 (GLYCOSYLTRANSFERASE) | gi3329262gbAAC68391.1  Glycyl tRNA Synthetase | 1dik00 (PHOSPHOTRANSFERASE) | 0.9895 |
| 5 | Q9NXD7  CDNA FLJ20307 FIS, CLONE HEP07254 | 1f13A0  (COAGULATION FACTOR) | gi3328889gbAAC68056.1  hypothetical protein | 1pysB0 (AMINOACYL- TRNASYNTHETASE) | 0.9751 |
| 6 | O94881  KIAA0784 PROTEIN (FRAGMENT) | 1pysB0  (AMINOACYL- TRNASYNTHETASE) | gi3329208gbAAC68343.1  Transcription- Repair Coupling | 1dik00 (PHOSPHOTRANSFERASE) | 0.969 |
| 7 | Q9NQ11  DJ37C10.3 (NOVEL ATPASE) (FRAGMENT) | 1kit00 (HYDROLASE) | gi3329088gbAAC68244.1  Exodeoxyribonuclease V, Gamma | 1f13B0 (COAGULATIONFACTOR) | 0.9637 |
| 8 | Q13393  PHOSPHOLIPASE D1 (EC 3.1.4.4) (PLD 1) (CHOLINE PHOSPHATASE 1) (PHOSPHATIDYLCHOLINE- HYDROLYZING PHOSPHOLIPASE D1) | 1kit00 (HYDROLASE) | gi3329208gbAAC68343.1  Transcription- Repair Coupling | 1dik00 (PHOSPHOTRANSFERASE) | 0.9608 |
| 9 | P98088  TRACHEOBRONCHIAL MUCIN (TBM) (MAJOR AIRWAY GLYCOPROTEIN) | 1kit00 (HYDROLASE) | gi6578115gbAAC68424.2  Ribonucleoside Reductase, Large Chain | 1rlr00 (OXIDOREDUCTASE) | 0.9594 |
| 10 | Q92995  UBIQUITIN CARBOXYL- TERMINAL HYDROLASE 13 (EC 3.1.2.15) | 1sly00  GLYCOSYLTRANSFERASE | gi3328511gbAAC67704.1  Clp Protease ATPase | 1pkm00  KINASE | 0.959 |
| 11 | O75585  MITOGEN- AND STRESS- ACTIVATED PROTEIN KINASE- 2 (FRAGMENT) | 1ddt00  TOXIN | gi3328772gbAAC67946.1  hypothetical protein | 1kit00 (HYDROLASE)  HYDROLASE | 0.9579 |
| 12 | O14664  PSD- 95/SAP90- ASSOCIATED PROTEIN- 2 (FRAGMENT) | 1xwl00  DNAREPLICATION | gi3329155gbAAC68296.1  Protein Translocase | 1sly00  GLYCOSYLTRANSFERASE | 0.9565 |
| 13 | O94847  KIAA0746 PROTEIN (FRAGMENT) . | 1kit00 (HYDROLASE)  HYDROLASE | gi3328409gbAAC67609.1  Isoleucyl- tRNA Synthetase | 1uaaA0  COMPLEX (HELICASE/DNA) | 0.9563 |
| 14 | ENSP00000169613  unknown | 1kit00 (HYDROLASE)  HYDROLASE | gi3328778gbAAC67951.1  multidomain protein family | 1b2nA0  no function | 0.9519 |
| 15 | ENSP00000222431  unknown | 1pamA0  GLYCOSYLTRANSFERASE | gi3329347gbAAC68470.1  Putative Outer Membrane Protein H | 1kit00 (HYDROLASE)  HYDROLASE | 0.9512 |
| 16 | Q9NR82  VOLTAGE- GATED POTASSIUM CHANNEL. | 1ami00  LYASE (CARBON- OXYGEN) | gi3328643gbAAC67826.1  C. psittaci hypothetical protein | 1kit00 (HYDROLASE)  HYDROLASE | 0.9502 |
| 17 | ENSP00000021402  unknown | 1xwl00  DNAREPLICATION | gi3329350gbAAC68472.1  Putative Outer Membrane Protein I | 1kit00 (HYDROLASE)  HYDROLASE | 0.9497 |
| 18 | Q15855  UVOMORULIN PRECURSOR (E- CADHERIN) (ARC- 1/UVOMORULIN) . | 1eut00  HYDROLASE | gi6578113gbAAC68344.2  Alanyl tRNA Synthetase | 1b0j00  LYASE | 0.9484 |
| 19 | Q99814  ENDOTHELIAL PAS DOMAIN PROTEIN 1 (EPAS- 1) (MEMBER OF PAS PROTEIN 2) (MOP2) . | 1ddt00  TOXIN | gi3329092gbAAC68820.1  DNA Topoisomerase I- Fused to SWI Domain | 1xwl00  DNAREPLICATION | 0.9458 |
| 20 | Q05655  PROTEIN KINASE C, DELTA TYPE (EC 2.7.1.- ) (NPKC- DELTA) . | 1fmk00  PHOSPHOTRANSFERASE | gi3329314gbAAC68439.1  Polyribonucleotide Nucleotidyltransferase | 1poxA0  OXIDOREDUCTASE (OXYGENASACCEPTOR) | 0.9456 |
|  |
| 21 | O95049  TIGHT JUNCTION PROTEIN ZO- 3 (ZONA OCCLUDENS 3 PROTEIN) (TIGHT JUNCTION PROTEIN 3) . | 2kfnA0  COMPLEX (POLYMERASE/DNA) | gi3329033gbAAC68192.1  hypothetical protein | 1kit00 (HYDROLASE)  HYDROLASE | 0.9451 |
| 22 | Q9ULP3  KIAA1177 PROTEIN (FRAGMENT) . | 1sly00  GLYCOSYLTRANSFERASE | gi3329167gbAAC68306.1  hypothetical protein | 1xwl00  DNAREPLICATION | 0.9431 |
| 23 | P17813  ENDOGLIN PRECURSOR (CD105 ANTIGEN) . | 1ba300  OXIDOREDUCTASE | gi3328676gbAAC67857.1  Transport ATP Binding Protein | 1ba300  OXIDOREDUCTASE | 0.9428 |
| 24 | ENSP00000218589  unknown | 1ba300  OXIDOREDUCTASE | gi3328486gbAAC67681.1  Low Calcium Response D | 1xwl00  DNAREPLICATION | 0.9393 |
| 25 | Q13493  MDC15. | 2kfnA0  COMPLEX (POLYMERASE/DNA) | gi3328764gbAAC67939.1  Lon ATP- dependent protease | 1a3wA0  TRANSFERASE | 0.9388 |
| 26 | P11021  78 KDA GLUCOSE- REGULATED PROTEIN PRECURSOR (GRP 78) (IMMUNOGLOBULIN HEAVY CHAIN BINDING PROTEIN) (BIP) . | 1hpm00  HYDROLASE (ACTINGONACIDANHYDRIDES) | gi3328822gbAAC67993.1  HSP- 70 | 1hpm00  HYDROLASE (ACTINGONACIDANHYDRIDES) | 0.9383 |
| 27 | ENSP00000224716  unknown | 1pamB0  GLYCOSYLTRANSFERASE | gi3328662gbAAC67844.1  60kDa Inner Membrane Protein | 1eut00  HYDROLASE | 0.9381 |
| 28 | O43301  KIAA0417 (FRAGMENT) . | 1a3wA0  TRANSFERASE | gi3328696gbAAC67876.1  hypothetical protein | 1pkyA0  PHOSPHOTRANSFERASE | 0.9365 |
| 29 | O94831  KIAA0726 PROTEIN. | 1kit00 (HYDROLASE)  HYDROLASE | gi3329344gbAAC68467.1  Putative Outer Membrane Protein E | 1kit00 (HYDROLASE)  HYDROLASE | 0.9361 |
| 30 | O43592  EXPORTIN T. | 1dik00 (PHOSPHOTRANSFERASE) | gi3328840gbAAC68009.1  Putative outer membrane protein A | 1kit00 (HYDROLASE)  HYDROLASE | 0.9359 |
| 31 | O95444  MUSCLE TFII- I REPEAT DOMAIN- CONTAINING PROTEIN 1. | 1acc00  TOXIN | gi3329273gbAAC68402.1  Insulinase family/Protease III | 1eut00  HYDROLASE | 0.9338 |
| 32 | Q12929  EPIDERMAL GROWTH FACTOR RECEPTOR KINASE SUBSTRATE EPS8. | 1vom00  MUSCLEPROTEIN | gi3328616gbAAC67801.1  Leucyl tRNA Synthetase | 1xwl00  DNAREPLICATION | 0.9324 |
| 33 | Q9NUX5  CDNA FLJ11073 FIS, CLONE PLACE1005026. | 1eut00  HYDROLASE | gi3328410gbAAC67610.1  Signal Peptidase I | 1eut00  HYDROLASE | 0.9299 |
| 34 | Q15029  KIAA0031 PROTEIN. | 1kit00 (HYDROLASE)  HYDROLASE | gi3329294gbAAC68421.1  Zinc Metalloprotease (insulinase family) | 1kit00 (HYDROLASE)  HYDROLASE | 0.9298 |
| 35 | O75170  KIAA0685 PROTEIN. | 1pjr00  HELICASE | gi3329125gbAAC68269.1  Yop C/Gen Secretion Protein D | 1sly00  GLYCOSYLTRANSFERASE | 0.9293 |
| 36 | P35913  ROD CGMP- SPECIFIC 3',5'- CYCLIC PHOSPHODIESTERASE BETA- SUBUNIT (EC 3.1.4.17) (GMP- PDE BETA) . | 1sly00  GLYCOSYLTRANSFERASE | gi3329066gbAAC68224.1  hypothetical protein | 2kfnA0  COMPLEX (POLYMERASE/DNA) | 0.9291 |
| 37 | Q12852  SERINE/THREONINE PROTEIN KINASE. | 1tyv00  VIRALADHESIONPROTEIN | gi3328700gbAAC67879.1  ClpC Protease ATPase | 1dik00 (PHOSPHOTRANSFERASE) | 0.929 |
| 38 | Q9NRE0  UBIQUILIN 3. | 3bct00  ARMADILLOREPEAT | gi3329069gbAAC68226.1  CHLPN 76kDa Homolog | 1sly00  GLYCOSYLTRANSFERASE | 0.9283 |
| 39 | P78563  DOUBLE- STRANDED RNA- SPECIFIC EDITASE 1 (EC 3.5.- .- ) (DSRNA ADENOSINE DEAMINASE) (RNA EDITING ENZYME 1) . | 1eut00  HYDROLASE | gi3328424gbAAC67623.1  Exodeoxyribonuclease V, Alpha | 1pii00  BIFUNCTIONAL (ISOMERASEANDSYNTHASE) | 0.928 |
| 40 | P19113  HISTIDINE DECARBOXYLASE (EC 4.1.1.22) (HDC) | 1lci00  OXIDOREDUCTASE | gi3329184gbAAC68322.1  Metal Transport P- type ATPase | 1ba300  OXIDOREDUCTASE | 0.9276 |
